# Supplementary material for: Sensitive Detection of Asymptomatic and Symptomatic Malaria with Seven Novel Parasite-Specific LAMP Assays and Translation for Use at Point-of-Care
Source: PubMed Central journal article supplement (PMC10269850; doi:10.1128/spectrum.05222-22), 2023-05-09
Supplement: spectrum.05222-22-s0001.pdf [file spectrum.05222-22-s0001.pdf]

# Supplementary Information

## Sensitive detection of asymptomatic and symptomatic malaria with seven novel parasite-specific LAMP assays and translation for use at point-of-care

Kenny Malpartida-Cardenas<sup>1,2</sup>, Nicolas Moser<sup>2</sup>, Felix Ansah<sup>3</sup>, Ivana Pennisi<sup>1</sup>, Diana Ahu Prah<sup>3,4</sup>, Linda Eva Amoah<sup>3,5</sup>, Gordon Awandare<sup>3</sup>, Julius Hafalla<sup>3,4</sup>, Aubrey Cunnington<sup>1</sup>, Jake Baum<sup>6,7</sup>, Jesus Rodriguez-Manzano<sup>1,\*</sup>, and Pantelis Georgiou<sup>2</sup>

<sup>1</sup>Department of Infectious Disease, Faculty of Medicine, Imperial College London, UK

<sup>2</sup>Department of Electrical and Electronic Engineering, Faculty of Engineering, Imperial College London, UK

<sup>3</sup>West African Center for Cell Biology of Infectious Pathogens, Department of Biochemistry, Cell and Molecular Biology, University of Ghana, Ghana

<sup>4</sup>Department of Infection Biology, Faculty of Infectious and Tropical Diseases, London School of Hygiene and Tropical Medicine, London, United Kingdom

<sup>5</sup>Immunology Department, Noguchi Memorial Institute for Medical Research, University of Ghana, Legon, Ghana

<sup>6</sup>Department of Life Sciences, Faculty of Natural Sciences, Imperial College London, UK

<sup>7</sup> School of Biomedical Sciences, University of New South Wales Sydney, Australia

\*email: j.rodriguez-manzano@imperial.ac.uk

Table S1. Synthetic DNA sequences (gBlocks).

| ID                                      | Sequence (5' to 3')                                                                                                                                                                                                                                                                                                                                                                                                                                                                                                                                                                                                                                                                                                                                                                                                                                                                                                                                                                                                                                                                                                                                                                                                                                                                                                   |
|-----------------------------------------|-----------------------------------------------------------------------------------------------------------------------------------------------------------------------------------------------------------------------------------------------------------------------------------------------------------------------------------------------------------------------------------------------------------------------------------------------------------------------------------------------------------------------------------------------------------------------------------------------------------------------------------------------------------------------------------------------------------------------------------------------------------------------------------------------------------------------------------------------------------------------------------------------------------------------------------------------------------------------------------------------------------------------------------------------------------------------------------------------------------------------------------------------------------------------------------------------------------------------------------------------------------------------------------------------------------------------|
| <i>P. cynomolgi</i><br>PcyM_0532100     | ACTTGAACCCACGGTGGTAGACGAAGTGCGAACGGGCACCTACCGCCAG<br>CTGTTTCACCCAGAGCAGTTAATATCAGGAAAGGAAAGACGCAGCAAATAA<br>TTTCGCAAGAGGACACTACACAATTGGAAAGGAAATAGTTGACATATGCT<br>TAGATCGAGTGAGAAAGTTAGCTGACAATTGCACAGGGCTGCAGGGTTTT<br>CTCATGTTTAATGCAGTGGGTGGAGGAACGGGAAGTGCCCTGGGGTGTCT<br>TCTGTTGGAAAGGCTAGCCATAGATTATGGAAAGAAATCCAAATFAAATT<br>TCTGTTCCCTGGCCCTCTCCCAAGTATCCACAGCTGTGGTGGAAACCATA<br>AACTCAGTTTTATCGACCCACTCTCTACTAGAACACACAGATGTAGCGAT<br>CATGTTAGATAATGAAGCTATATACGACATATGTAAAAAAATTTGGACA<br>TAGAAAGGCCTACTTATACAAACCTAAACAGACTAATAGCTCAGGTCATT<br>TCTTCCCTAACGGCTTCTCTACGATTTGATGGTGCCCTAAATGTGGATGT<br>TACGGAATTTCAAACGAACTTAGTACCTTACCCACGTATCCATTTTATGT<br>TATCATCGTACGCCCTATCATTAGTGCAGAGAAGGCA                                                                                                                                                                                                                                                                                                                                                                                                                                                                                                                                                                                                          |
| <i>P. vivax</i><br>PVP01_0530800        | GTGCCCTCGCTGCGTGTTCGTGGACTTGGAACCCACGGTGGTGGACGAAGT<br>GCGAACGGGGACCTACCGCCAGCTGTTTCACCCAGAGCAGCTAATCTCCG<br>GCAAGGAAGACGCAGCAAAACAACCTTCGCCAGGGGGCACTACACAATTGGG<br>AAGGAAATCGTAGACGTCTGTTTAGATCGAGTGAGAAAGTTGGCGGACAA<br>TTGCACAGGGCTTCAAGGCTTTCTCATGTTCAATGCCGTGGGTGGAGGAA<br>CAGGAAGTGGTCTGGGATGTCTTTTGTAGAAAGGCTAGCCATAGATTAC<br>GGGAAGAAATCGAAGTTGAATTTTTGCTCCTGGCCTTCCCCTCAAGTCTC<br>CACAGCTGTGGTGGAAACCATATAACTCGGTTCTGTCTACCCACTCTCTTC<br>TAGAACACACAGATGTAGCGATTATGTTAGATAATGAAGCTATCTACGAC<br>ATATGTAAAAAGAATTTAGATATTGAAAGGCCGACCTATACAAACCTAAA<br>CAGATTAATAGCTCAGGTCATTTTCTCGTTGACGGCTTCTCCGTTTTG<br>ATGGTGCCTTAAATGTAGACGTTACTGAATTTCAAACGAACTTAGTGCCC<br>TACCCACGTATCCATTTTCATGCTGTGCTCTTACGCCCCATCATTAGCGC<br>TGAGAAGGCATATCACGAGCAGCTGTCCGTTTCGGAAATTACAAACTCTG<br>CATTTGAGCCTGCTTCTATGATGGCCAAGTGTGACCCTCGTCATGGCAAA<br>TACATGGCTTGCTGCCTAATGTACAGGGGTGATGTGCTGCCGAAGGATGT<br>CAATGCTGCTGTTGCGACTATTAAGACTAAGAGGTCCATTAGTTTTGTTG<br>ACTGGTGCCCAACTGGATTCAAATGTGGTATTAACCTACCAACCCACCGACG<br>GTTGTCCCTGGGGGAGATTTGGCCAAAGTGATGAGAGCCGTCTGCATGAT<br>AAGTAACCTCCACTGCAATTTGCTGAAGTGTTTTTCTCGAATGGACCAGAAAT<br>TTGACCTCATGTATGCTAAGAGGGCGTTTCGTACACTGGTACGTTGGAGAA<br>GGTATGGAGGAGGGGAGTTCAAGTGAAGCCAGGGAGGACTTGGCCGCTTT<br>GGAAAAGGACTACGAAGAGGTCGGCATCGAGACCAACGAGGGAGAAGGCC<br>AAGACGAGGGCTACGAATGA |
| <i>P. falciparum</i><br>PF3D7_1343700.1 | CGATTTGATGAAGAAAAGATTAAGATTTTTTACAAGAAATCGATAAAATTA<br>ATCATGTAACCAGAGATAAAACAAGGAAGAATATTCTTAGATAGGGATAGT<br>GAGTTATTTAGAATTAATACTTAACCTTCTTAAGAAATCCGTTAACTATACC<br>CATACAAAAGATTTAAGTGAAAGTGAAGCCTTGTTGAAAAGAAGCAGAAT<br>TTTATGGTATTAATTTTTACCATTCCCATTAGTATTTTGTATAGGTGGA<br>TTTGATGGTGTAGAATATTTAAATTCGATGGAATTAATAGATATTAGTCA<br>ACAATGCTGGCGTATGTGTACACCTATGTCTACCAAAAAAGCTTATTTTTG<br>GAAGTGCTGTATTGAATAATTTCTTATACGTTTTTTGGTGGTAATAACTAT<br>GATTATAAGGCTTTATTTGAAACTGAGGTGATGATCGTTTAAAGAGATGT<br>ATGGTATGTTTCAAGTAATTTAAATATACCTAGAAGAAATAATTGTGGTG<br>TTACGTCAAATGGTAGAATTTATTGTATTGGGGGATATGATGGCTCTTCT<br>ATTATACCGAATGTAGAAGCATATGATCATCGTATGAAAGCATGGGTAGA<br>GGTGGCACCTTTGAATACCCCTAGATCATCAGCTATGTGTGTTGCTTTTG<br>ATAATAAAATTTATGTCATTGGTGGAACTAATGGTGAGAGATTAATTTCT<br>ATFGAAGTATATGAAGAAAAAATGAATAAATGGGAACAATTTCCATATGC<br>CTTATTAGAAGCTAGAAGTTCAGGAGCAGCTTTTAATTACCTTAATCAAA<br>TATATGTTGTTGGAGGTATTGATAATGAACATAACATATTAGATTCCGTT<br>GAACAATATCAACCATTTAATAAAAAGATGGCAATTTCTAAATGGTGTACC<br>AGAGAAAAAAATGAATTTTGGAGCTGCCACATTTGTCAGATTTCTATATAA<br>TTACAGGAGGAGAAAAATGGCGAAGTTCTAAATTCATGTCATTTCTTTTCA<br>CCAGATACAAATGAATGGCAGCTTGGCCCATCTTTATTAGTTCCAGATT<br>TGGTCACTCCGTTTTAATAGCAAATATATAA                                                                                                  |

Table S1. Synthetic DNA sequences (gBlocks).

| ID                                      | Sequence (5' to 3')                                                                                                                                                                                                                                                                                                                                                                                                                                                                                                                                                                                                                                                                                                                                                                                                                                                                                                                                                                                                                                                                                                                                                                                                                                                                                                                                                                                                                                                                                                                                                                                                                                             |
|-----------------------------------------|-----------------------------------------------------------------------------------------------------------------------------------------------------------------------------------------------------------------------------------------------------------------------------------------------------------------------------------------------------------------------------------------------------------------------------------------------------------------------------------------------------------------------------------------------------------------------------------------------------------------------------------------------------------------------------------------------------------------------------------------------------------------------------------------------------------------------------------------------------------------------------------------------------------------------------------------------------------------------------------------------------------------------------------------------------------------------------------------------------------------------------------------------------------------------------------------------------------------------------------------------------------------------------------------------------------------------------------------------------------------------------------------------------------------------------------------------------------------------------------------------------------------------------------------------------------------------------------------------------------------------------------------------------------------|
| <i>P. malariae</i><br>PmUG01_12021200.1 | <p>ATGGAAGGAGAAAAAATAAAATCCAACAGTATTTCAAATTTTTCTGTCCAC<br/>           GTATGATAGAGAATCCGGTGTAAACAGCAACAGCGATGACAGAAGTGAAA<br/>           GTAGTAGTGAAAATGAGTCTAATTCATTTATGAATATGACAAGCGATAAA<br/>           AATGAAAAACAGAAAATAATAGTTTTGCATTAATAATAGCAGTTTTGT<br/>           AAACATGAAAAGATAGTTTATTAGAGTCGATAGATTTGAGTGTATTAGATT<br/>           CAAACTTTGATACGAAAAAAGATTTTTTACCAAGTAATTTTTCAAAAAAC<br/>           CCAATAATTTATCAAAAGAAAATATAGTGGCTGGCCCCCGTCCAAATT<br/>           TTAAATAAAAAGTGATTCGATGTTTATGTCGAAGAGTAAAGACATGAACT<br/>           TAACGGACGCAAGTAATAATAATGTGAACATATCCGTAAAAATAACACG<br/>           AAAAAAGAAATTTTTATGGATGCCGCAACAGCATCTTTAAATGCGAACGA<br/>           GGAAAATGCAATGAATAATTTAAAAAGTTTACGAATACAAAGGCCCTCC<br/>           CCGATGATACATATGAAAAGAAAATAATCGAAACCGAGTTAAGTGATTCC<br/>           AGTGATTTTGA AACATGGTAGGTGATTTAAGAATCACTTTTATAAATTTG<br/>           GTTAAAGAAGACACAGATGAATTTTATGAACTATGATAGATATTAACGT<br/>           TGGGGGAGCTATTTTTGAAACATCCAGACATACGTTAACTCAACAGAAAAG<br/>           ATTCTTTTATAGAAAACTATTAAGTGGTAGATATCATGTAACAAGAGAT<br/>           AAACAGGGTAGAATATTTTAGATCGTGATAGTGAATTATTTAGAATTAT<br/>           ATTAACCTTCTTAAGAAATCCTTTAACTGTTCCAATACCAAAAAGATTTGA<br/>           GTGAAAGTGAAGCATTATTAAGAGAGGCAGAATTTTATGGTTTAAACAAT<br/>           TTCTTGATGTATTCGGAGGAAATAATTATGATTATAAAGCATTATTTGA<br/>           AACAGAAGTGTATGATCGTTTGGAGATACATGGTTTGTTC AAGTAATT<br/>           TAAATATACCAAGAAGAAAATAATTGTGGTGTACATCCAATGGTAGAATT<br/>           TATTGTATTGGTGGTTATGATGGTTCCTCCATTATACCAATGTTGAAGC<br/>           TTATGATCATCGGATGAAAAGCATGGGTAGAAATGACACCTTAAATACTC<br/>           CAAGATCTTCATCCA</p> |
| <i>P.o. curtisi</i><br>GU813971.1       | <p>ATGTTGGAAACAACCTGACACCTTAGATTATATTGATGGTACAGATAACGAGAA<br/>           AAATATAATTTCCCAGTTAAAACCAGACTACTCTTATGTATATTATTT<br/>           CAACGAAATTAACGCTATGCAGAATATCACAAAAGAAATATCTCCAAATAT<br/>           GAAAGTATATATAATTCTAGCATCAAAACCTTAAAAGAATACATAGAAAATG<br/>           CAGTCGATACATGTAAACCTAAGAAAAATGAAATGATTGCTTTTAAACAAAAT<br/>           TTTAGAAGATCTGAAAAAATTAAGGGACTTGAAGGACATTATGAAGGAAAA<br/>           CTTCATGCATACAAAACATATATGAAGGAATATCAAACTGTTTAAATAATA<br/>           AAAGCAATAAAACTATGCCACAGATAAGAAGTCTCAAGTACGATATTAATGA<br/>           ATTGCTAAGCGATATCAATTGCAAAACAAAAGTCTCAATGAACTTATAAT<br/>           AATATGATTAAGATATATTTACTAGAATTTAACAATGTACCGTACGAAACAC<br/>           ACATCCAATATATAAAGAACTTTAAAAGTTCTTTGGACTTTGGAAATCATT<br/>           AATAAATAGGGTACAAAAGAGAATTAGGCAAAAATAATATATAGACTCAACGA<br/>           AATTTTTACAGGAAGAAAATAAAATATATTATAGAAAAGATTTTATACCCATT<br/>           AGATAAAGTCAAATATGGAATGGATTATATAAAGGATCTTTCCAAGAAAGAAG<br/>           TCCTAAATGAAGTTACCATAGATGTCTTAAAATAATATATTACGCTACCT<br/>           TACTATTACGCC</p>                                                                                                                                                                                                                                                                                                                                                                                                                                                                                                                                                                                       |
| <i>P.o. wallikeri</i><br>GU813972.1     | <p>ATGTTGGAAACAACCTGACACCTTAGATTATATTGATGGCAGATAACGAGAA<br/>           AAATATAATTTCCCAGTTAAAACCAGACTACGCTTATGTATATTATTTCAACG<br/>           AAATTAACGCTATACAGAATATCACAAAAGAAATATCTTCCAATATGAAAAGT<br/>           ATATATAATTCTAGCATCAAAACCTTAAAAGAAGACATAGAAAATGCAGTCGA<br/>           TACATGTAACCTAAGAAAAATGAAATGATTGCTTTGACAAAAATTTTAGAAG<br/>           ATCCTGAAAAAATTAAGGGACTTGAAGGGCATTATGAAGGAAAATTTTATGCAT<br/>           ACAGAACATATATGAAGGAATATCAAACTGTTTAAATAAAATAAAGCAATAAAA<br/>           CGATGCCACAGATAAGAAGTCTCAAGTACGATATTAATGAATTGCTAAGCGATA<br/>           TCATTTGCAAAACAAAAGTCTCAATGAAACCTATAATAATATGATTAAGATAT<br/>           ATTTACTAGAATTTAACAATGTACCGTACGAAAACGCACATCCAATATATAAAGA<br/>           ACATTAAGTTCTTTGGACTTTGGGAGTCAATTAATAAATAGGGCACAAGAG<br/>           AATTAGGCAAAAAGTAATATATAGACTCAACGAAATTTGTACAGGAAGAAATAA<br/>           AATATATATAGAAAGATTTTATACCCATTTAGATAAAGTCAAATATGGAATGG<br/>           ATTATATAAAGGATCTTTCCAAGAAAGAAGTCCTAAATGAAGTACCTTAGATG<br/>           TCCTTAAAATAATATATTACGCTACCTTACTATTACGCC</p>                                                                                                                                                                                                                                                                                                                                                                                                                                                                                                                                                                                                          |

Table S2. Reference sequences accession numbers.

| Kelch 13 (K13)        | Alpha-Tubulin<br>(TUBA2) | Alpha-Tubulin<br>(TUBA2) | Reticulocyte Binding<br>Protein 2 (RBP2) |
|-----------------------|--------------------------|--------------------------|------------------------------------------|
| PmUG01_12021200.1     | PcyM_0532100             | PADL01_0421000           | GU813971.1                               |
| PocGH01_12019400.1    | PCYB_053570              | PfML01_040028800         | JF894427.1                               |
| PF3D7_1343700         | PVP01_0530800            | PfSN01_040026800         | KU510234.1                               |
| PKNOH_S09541100t35_1  | PVX_090155               | PfGA01_040026700         | JF894428.1                               |
| PKNH_1257700.1        | XM_002258237.1           | PfGA01_040026700         | GU813972.1                               |
| PVX_083080.1          | PocGH01_05032600         | PRELSG_0516800           | JF894422.1                               |
| PcyM_1212800t36_1     | PmUG01_05038900t         | YYE_03958                | JF894425.1                               |
| PVP01_1211100.1       | PF3D7_0422300            | PRG01_0426900            | JF894426.1                               |
| PCHAS_1361300.1       | PfTG01_040028100         | PYYM_0523200             | MG251661.1                               |
| PCYB_122000           | PCOAH_00012520           | PY17X_0524100            | JF894423.1                               |
| KT792970.1            | AK88_05372               | PY04063                  |                                          |
| KT792969.1            | PKNH_0514200             | PGAL8A_00192500          |                                          |
| PPRFG01_1345600.1     | PKNOH_S04366800          | PocGH01_05032600         |                                          |
| PfGA01_130049800t41_1 | PCHAS_0522900            | PmUG01_05038900          |                                          |
| PfGB4_130049600t41_1  | YYG_03587                | PfKH01_090008100         |                                          |
| PfHB3_130050000t41_1  | PRCDC_0419500            | PfCD01_090008100         |                                          |
| PfTG01_130049400t41_1 | PBLACG01_0420400         | PfSD01_090008800         |                                          |
| PfSN01_130046700t41_1 | PGABG01_0419300          | PfML01_090008200         |                                          |
| PfKH02_130046600t41_1 | PfHB3_040025700          | PfTG01_090008100         |                                          |
| Pf7G8_130048100t41_1  | PBILCG01_0415500         | PfKE01_090008100         |                                          |
| PfCD01_130049300t41_1 | PGSY75_0422300           | PfIT_090008400           |                                          |
| PfGN01_130050400t41_1 | PfKE01_040028800         | PfDd2_090009000          |                                          |
| PfKE01_130049300t41_1 | PF3D7_0422300            | PfKH02_090008500         |                                          |
| PfML01_130047600t41_1 | PfIT_040026800           | PfGA01_090008100         |                                          |
| PfSD01_130050400t41_1 | PBANKA_0522700           | PfGB4_090008700          |                                          |
| PfDd2_130049500t41_1  | PfTG01_040028100         | PfSN01_090008400         |                                          |
| PfIT_130049000t41_1   | PfDd2_040027300          | PfHB3_090008400          |                                          |
| PfKH01_130047700t41_1 | Pf7G8_040026600          | PfGN01_090008600         |                                          |
|                       | PfGN01_040027400         | Pf7G8_090008600          |                                          |
|                       | PfKH01_040028700         | PVX_098630               |                                          |
|                       | PfSD01_070037900         | PY01155                  |                                          |
|                       | PfKH02_040027700         | AK88_00920               |                                          |
|                       | PfGB4_040027000          | PCOAH_00018900           |                                          |
|                       | PPRFG01_0420000          | PKNOH_S06402900          |                                          |
|                       | PfCD01_040027500         | PKNH_0701400             |                                          |
|                       | YYG_04031                | PCYB_071150              |                                          |

Table S3. Primer sequences of LAMP assays and PCR assays targeting human-malaria.

| Assay        | Primer              | Sequence (5' to 3')                                          | Author                     | Reference      |
|--------------|---------------------|--------------------------------------------------------------|----------------------------|----------------|
| LAMP-ACTB    | F3                  | GGCGGGCTACAGCTTCA                                            | Malpartida-Cardenas et al. | [29] LAMP-ACTB |
| B3           | GGAAGAGTGCCCTCAGGGC |                                                              |                            |                |
| LAMP-ACTB    | LF                  | AGTTCTCCTTAATGTCACGG                                         |                            |                |
| LAMP-ACTB    | LB                  | CGAGCTGCCTGAGGG                                              |                            |                |
| LAMP-ACTB    | FIP                 | TTGCTCGAAGTCCAGGGCGAGCGGGAAATCGTGC                           |                            |                |
| LAMP-ACTB    | BIP                 | TGCTTCCAGCTCCTCCCTGATTGCCAATGGTGATGACCT                      |                            |                |
| LAMP-Pmk13   | F3                  | AAATAAAATCCACAGATATTTCAAATTT                                 | This study                 | This study     |
| LAMP-Pmk13   | B3                  | TCGTATCAAAGTTTGAATCTAATAC                                    |                            |                |
| LAMP-Pmk13   | LF                  | GCTGTTGCTGTTAACACC                                           |                            |                |
| LAMP-Pmk13   | LB                  | AATAGCAGTTTTGTAAACATGAAAGAT                                  |                            |                |
| LAMP-Pmk13   | FIP                 | TTCACACTACTTTCACCTTCTGTCATC-TCTGTCACGTATGATAGAGAATC          |                            |                |
| LAMP-Pmk13   | BIP                 | CATTTATGAATATGACAAGCGATAAAATGAAA-ACTCAAATCTATCGACTCTAATAAACT |                            |                |
| LAMP-PoRBP2  | F3-c                | CCCAGTTAAAACCAGACTAGG                                        | This study                 | This study     |
| LAMP-PoRBP2  | B3-c                | CTGTATGCAITGAAATTTTCCTTCA                                    |                            |                |
| LAMP-PoRBP2  | LF-c                | ACTTTCATATTTGGGAGATATTTCTTTGTG                               |                            |                |
| LAMP-PoRBP2  | LB-c                | TGCTTTAACAAAAATTTTGAAGATCCT                                  |                            |                |
| LAMP-PoRBP2  | FIP-c               | TGTAFTCTTTAAGGTTTTGATGCTAGAAAT-ACGAAATTAACCGCTATGCAGAATA     |                            |                |
| LAMP-PoRBP2  | BIP-c               | TGCAGTCGATACATGTAACCTAAGAAA-GTCCCTCAAAGTCCCTTAATTTTTTC       |                            |                |
| LAMP-PoRBP2  | F3-w                | TTCCCAAGTTAAAACCAGACTAC                                      |                            |                |
| LAMP-PoRBP2  | B3-w                | TGTATGCAITGAAATTTTCCTTC                                      |                            |                |
| LAMP-PoRBP2  | LF-w                | ACTTTCATATTTGGAAGATATTTCTTTGTG                               |                            |                |
| LAMP-PoRBP2  | LB-w                | GCTTTGACAAAAATTTTGAAGATCCT                                   |                            |                |
| LAMP-PoRBP2  | FIP-w               | TGTCCTCTTTAAGGTTTTGATGCTAGAA-CAACGAAATTAACCGCTATAGAGAATA     |                            |                |
| LAMP-PoRBP2  | BIP-w               | TGCAGTCGATACATGTAACCTAAGAAA-CCCTTCAAAGTCCCTTAATTTTTTC        |                            |                |
| LAMP-PvTUBA2 | F3                  | GTGGACGAAAGTCCGAAAG                                          | This study                 | This study     |
| LAMP-PvTUBA2 | B3                  | CTTTCTAACAAAAGACATCCGAGAC                                    |                            |                |
| LAMP-PvTUBA2 | LF                  | GCCGGAGATTAGCTGCTCT                                          |                            |                |
| LAMP-PvTUBA2 | LB                  | AATTCACAGGGCTTCAAGG                                          |                            |                |
| LAMP-PvTUBA2 | FIP                 | CCCCCTGGGAAAGTTGT-TACCCGCCAGCTTTTCAC                         |                            |                |
| LAMP-PvTUBA2 | BIP                 | TCGTAGACGCTCTGTTTAGATCGAGT-ACCCACGGCAITGAAACATG              |                            |                |

Table S3. Primer sequences of LAMP assays and PCR assays targeting human-malaria.

| Assay         | Primer | Sequence (5' to 3')                                 | Author                     | Reference  |
|---------------|--------|-----------------------------------------------------|----------------------------|------------|
| LAMP-PfK13    | F3     | GGAGCAGCTTTTAATTACCTT                               | Malpartida-Cardenas et al. | [31]       |
| LAMP-PfK13    | B3     | ATGACATGAATTTAGAACTTCGCC                            |                            |            |
| LAMP-PfK13    | LF     | AATATGTTATGTCATTATCAA                               |                            |            |
| LAMP-PfK13    | LB     | GAGAAAAAATGAATTTGGAGCT                              |                            |            |
| LAMP-PfK13    | FIP    | TGGTTGATATTGTTCAAGGAACTC-ATGCAATATATGTTGTTGGAGGT    |                            |            |
| LAMP-PfK13    | BIP    | TGGCAATTTCTA AATGGTGTACCA-ATAAGAATCTGACAAATGTGCC    |                            |            |
| LAMP-PcyTUBA2 | F3     | CAATTTGGAAAGGAAATAGTTGACAT                          | This study                 | This study |
| LAMP-PcyTUBA2 | B3     | GGTTCGATAAAAAGTGAATGATGG                            |                            |            |
| LAMP-PcyTUBA2 | LF     | GCCCTGTGCAATTTGTCAG                                 |                            |            |
| LAMP-PcyTUBA2 | LB     | GAAATCCAAATFAAATTTCTGTTCCCTGG                       |                            |            |
| LAMP-PcyTUBA2 | FIP    | GCATTAACATGAGAAAACCCTGCA-ATGCTTAGATCGAGTGAGAAAAGTTA |                            |            |
| LAMP-PcyTUBA2 | BIP    | CTGTTGGAAAGGCTAGCCATAGATATATGGA-GTGGATACTTGGGGAGAG  |                            |            |
| LAMP-Pan18s   | F3     | GTAATCAATCGAGTTTCTGACC                              | Han et al.                 | [28]       |
| LAMP-Pan18s   | B3     | CTTGTACATACCTCTCTTCT                                |                            |            |
| LAMP-Pan18s   | LF     | CGTCATAGCCATGTTAGGCC                                |                            |            |
| LAMP-Pan18s   | LB     | AGCTACCACATCTAAGGAAGGCAG                            |                            |            |
| LAMP-Pan18s   | FIP    | TCGAACTCTAATCCCGTTACCTATCAGCTTTGATGTTAGGGT          |                            |            |
| LAMP-Pan18s   | BIP    | CGGAGAGGGAGCCTGAGAAATAGAAATTTGGGTAATTTACGGC         |                            |            |
| LAMP-Pk18s    | F3     | CCATCTAFTTCTTTTTTTGGGTATG                           | Lau et al.                 | [27]       |
| LAMP-Pk18s    | B3     | CAGTGGAGGAAAAGTACGAA                                |                            |            |
| LAMP-Pk18s    | LF     | TAGACACACATCGTT                                     |                            |            |
| LAMP-Pk18s    | LB     | GCAGGCGTGCACACT                                     |                            |            |
| LAMP-Pk18s    | FIP    | GTTGTTGCCTTAAACTTCCCTGTGTCTTGTATGTTAAAGCTTCTTAGAGG  |                            |            |
| LAMP-Pk18s    | BIP    | TGATGTCCTTAGATGAACACTAGGCTTTGCAAGCAGCTAAAAATCGT     |                            |            |
| PCR-Pan       | F      | GCTCTTTCTTTGATTTCTTGGATG                            | Kamau et al.               | [32]       |
| PCR-Pan       | R      | AGCAGGTTAAGATCTCCTTCG                               |                            |            |
| PCR-Pan       | P      | /5Cy5/ATGGCCGT/TAO/TTTAGTTCGTG/3IAbRQSp/            |                            |            |
| PCR-Pf        | F      | ATTGCTTTTGAGAGGTTTTGTACTTT                          | Kamau et al.               | [32]       |
| PCR-Pf        | R      | GCTGTAGTATTCAAACACAAATGAAC TCAA                     |                            |            |
| PCR-Pf        | P      | /56-FAM/CATAACAGACGGGTAGTCAT/3BHQ_1/                |                            |            |

Table S4. Results obtained with LAMP-PfK13 and LAMP-Pan18S with cohort 1 (N = 70) according to syndromic stratification.

| Symptoms     | Sample (n) | LAMP-PfK13 |        |        |        |        |     | LAMP-Pan18S |        |        |        |        |     |
|--------------|------------|------------|--------|--------|--------|--------|-----|-------------|--------|--------|--------|--------|-----|
|              |            | TP (n)     | TN (n) | FP (n) | FN (n) | SEN    | SPE | TP (n)      | TN (n) | FP (n) | FN (n) | SEN    | SPE |
| Symptomatic  | 8          | 8          | /      | /      | 0      | 100.00 |     | 8           | /      | /      | 0      | 100.00 |     |
| Asymptomatic | 21         | 19         | /      | /      | 2      | 90.48  |     | 20          | /      | /      | 1      | 95.24  |     |
| Asymptomatic | 26         | 21         | /      | /      | 5      | 80.77  |     | 23          | /      | /      | 3      | 88.46  |     |
| Uninfected   | 15         | /          | 15     | /      | /      | /      |     | /           | 15     | /      | /      | /      |     |
| Total        | 70         | 48         | 15     | 0      | 7      | 87.27  | 100 | 51          | 15     | 0      | 4      | 92.73  | 100 |

<sup>a</sup> Asymptomatic with detectable parasitemia

<sup>b</sup> Asymptomatic with submicroscopic parasitemia

Table S5. Results obtained from microscopy examination and TaqMan PCR-Pf (n = 70).

| Cat.  | PCR-Pf Ct (cycles) | DNA Conc. (copies/reaction)*            | Sample (n) | TP (n) | FN (n) | TN (n) | FP (n) | SEN(%) | SPE(%) | ACC(%) |
|-------|--------------------|-----------------------------------------|------------|--------|--------|--------|--------|--------|--------|--------|
| H     | < 24               | $> 2.34 \times 10^3$                    | 16         | 14     | 2      | /      | /      | 87.5   | /      | /      |
| M-L   | [24 - 29)          | $[2.34 \times 10^3 - 8.03 \times 10^1]$ | 27         | 13     | 14     | /      | /      | 48.1   | /      | /      |
| L     | $\geq 29$          | $\leq 8.03 \times 10^1$                 | 12         | 2      | 10     | /      | /      | 16.7   | /      | /      |
| U     | negative           |                                         | 15         | /      | /      | 13     | 2      | /      | /      | /      |
| TOTAL |                    |                                         | 70         | 29     | 26     | 13     | 2      | 52.7   | 86.7   | 60     |

\*DNA concentration (copies/reaction) was calculated based on PCR-Pf Ct values using 1  $\mu$ L of sample in a final reaction volume of 10  $\mu$ L.

"TP" true positives; "FN" false negatives; "TN" true negatives; "FP" false positives. "H" high; "M-L" medium-low; "L" low; "U" uninfected.

Table S6. Results obtained using the RDT Malaria Antigen (HRP-2) from CELISA and TaqMan PCR-Pf (n = 70).

| Cat. | PCR-Pf Ct (cycles) | DNA Conc. (copies/reaction)*            | Sample (n) | TP (n) | FN (n) | TN (n) | FP (n) | SEN(%) | SPE(%) | ACC(%) |
|------|--------------------|-----------------------------------------|------------|--------|--------|--------|--------|--------|--------|--------|
| H    | < 24               | $> 2.34 \times 10^3$                    | 16         | 15     | 1      | /      | /      | 93.8   | /      | /      |
| M-L  | [24 - 29)          | $[2.34 \times 10^3 - 8.03 \times 10^1)$ | 27         | 21     | 6      | /      | /      | 77.8   | /      | /      |
| L    | $\geq 29$          | $\leq 8.03 \times 10^1$                 | 12         | 1      | 11     | /      | /      | 8.3    | /      | /      |
| U    |                    | negative                                | 15         | /      | /      | 13     | 2      | /      | /      | /      |
|      |                    | TOTAL                                   | 70         | 37     | 18     | 13     | 2      | 67.3   | 86.7   | 71.4   |

\*DNA concentration (copies/reaction) was calculated based on PCR-Pf Ct values using 1  $\mu$ L of sample in a final reaction volume of 10  $\mu$ L.

"TP" true positives; "FN" false negatives; "TN" true negatives; "FP" false positives. "H" high; "M-L" medium-low; "L" low; "U" uninfected.



Table S7. Evaluation of samples from Obom with LAMP-Pan18S and TaqMan PCR-Pan (n = 70).

| Cat. | PCR-Pan Ct (cycles) | DNA Conc. (copies/reaction)*            | Sample (n) | TP (n) | FN (n) | TN (n) | FP (n) | SEN(%) | SPE(%) | ACC(%) |
|------|---------------------|-----------------------------------------|------------|--------|--------|--------|--------|--------|--------|--------|
| H    | < 22                | $> 2.34 \times 10^3$                    | 16         | 16     | 0      | /      | /      | 100    | /      | /      |
| M-L  | [22 - 27]           | $[2.34 \times 10^3 - 8.03 \times 10^1]$ | 27         | 27     | 0      | /      | /      | 100    | /      | /      |
| L    | $\geq 27$           | $\leq 8.03 \times 10^1$                 | 12         | 7      | 5      | /      | /      | 58.3   | /      | /      |
| U    | negative            |                                         | 15         | /      | /      | 14     | 1      | /      | /      | /      |
|      | TOTAL               |                                         | 70         | 50     | 5      | 14     | 1      | 90.9   | 93.3   | 91.4   |

\*DNA concentration (copies/reaction) was calculated based on PCR-Pan Ct values using 1  $\mu$ L of sample in a final reaction volume of 10  $\mu$ L.

"TP" true positives; "FN" false negatives; "TN" true negatives; "FP" false positives. "H" high; "M-L" medium-low; "L" low; "U" uninfected

Table S8. Evaluation of samples from Cape Coast with LAMP-Pan18S and TaqMan PCR-Pan (n = 94).

| Cat. | PCR-Pan Ct (cycles) | DNA Conc. (copies/reaction)*            | Sample (n) | TP (n) | FN (n) | TN (n) | FP (n) | SEN(%) | SPE(%) | ACC(%) |
|------|---------------------|-----------------------------------------|------------|--------|--------|--------|--------|--------|--------|--------|
| H    | < 22                | $> 2.34 \times 10^3$                    | 40         | 39     | 1      | /      | /      | 97.5   | /      | /      |
| M-L  | [22 - 27]           | $[2.34 \times 10^3 - 8.03 \times 10^1]$ | 23         | 22     | 1      | /      | /      | 95.7   | /      | /      |
| L    | $\geq 27$           | $\leq 8.03 \times 10^1$                 | 20         | 6      | 14     | /      | /      | 30     | /      | /      |
| U    | negative            |                                         | 11         | /      | /      | 11     | 0      | /      | /      | /      |
|      | TOTAL               |                                         | 94         | 67     | 16     | 11     | 0      | 80.7   | 100    | 83     |

\*DNA concentration (copies/reaction) was calculated based on PCR-Pan Ct values using 1  $\mu$ L of sample in a final reaction volume of 10  $\mu$ L.

"TP" true positives; "FN" false negatives; "TN" true negatives; "FP" false positives. "H" high; "M-L" medium-low; "L" low; "U" uninfected

Table S9. Results obtained with LAMP-PfK13 and TaqMan PCR-Pf (n = 164).

| Cat. | PCR-Pf Ct (cycles) | DNA Conc. (copies/reaction)*            | Sample (n) | TP (n) | FN (n) | TN (n) | FP (n) | SEN(%) | SPE(%) | ACC(%) |
|------|--------------------|-----------------------------------------|------------|--------|--------|--------|--------|--------|--------|--------|
| H    | < 24               | $> 2.34 \times 10^3$                    | 56         | 56     | 0      | /      | /      | 100    | /      | /      |
| M-L  | [24 - 29]          | $[2.34 \times 10^3 - 8.03 \times 10^1]$ | 50         | 49     | 1      | /      | /      | 98     | /      | /      |
| L    | $\geq 29$          | $\leq 8.03 \times 10^1$                 | 31         | 13     | 18     | /      | /      | 42     | /      | /      |
| U    | negative           |                                         | 27         | /      | /      | 27     | 0      | /      | /      | /      |
|      | TOTAL              |                                         | 164        | 118    | 19     | 27     | 0      | 86.1   | 100    | 88.4   |

\*DNA concentration (copies/reaction) was calculated based on PCR-Pf Ct values using 1  $\mu$ L of sample in a final reaction volume of 10  $\mu$ L.

"TP" true positives; "FN" false negatives; "TN" true negatives; "FP" false positives. "H" high; "M-L" medium-low; "L" low; "U" uninfected.

Table S10. Results obtained with LAMP-Pan18S and TaqMan PCR-Pan (n = 164).

| Cat. | PCR-Pan Ct (cycles) | DNA Conc. (copies/reaction)*            | Sample (n) | TP (n) | FN (n) | TN (n) | FP (n) | SEN(%) | SPE(%) | ACC(%) |
|------|---------------------|-----------------------------------------|------------|--------|--------|--------|--------|--------|--------|--------|
| H    | < 22                | $> 2.34 \times 10^3$                    | 56         | 55     | 1      | /      | /      | 98.2   | /      | /      |
| M-L  | [22 - 27]           | $[2.34 \times 10^3 - 8.03 \times 10^1]$ | 50         | 49     | 1      | /      | /      | 98     | /      | /      |
| L    | $\geq 27$           | $\leq 8.03 \times 10^1$                 | 32         | 13     | 19     | /      | /      | 40.6   | /      | /      |
| U    | negative            |                                         | 26         | /      | /      | 25     | 1      | /      | /      | /      |
|      | TOTAL               |                                         | 164        | 117    | 21     | 25     | 1      | 84.8   | 96.2   | 86.6   |

\*DNA concentration (copies/reaction) was calculated based on PCR-Pan Ct values using 1  $\mu$ L of sample in a final reaction volume of 10  $\mu$ L.

"TP" true positives; "FN" false negatives; "TN" true negatives; "FP" false positives. "H" high; "M-L" medium-low; "L" low; "U" uninfected

Table S11. TTP values of the samples tested on the Lab-on-Chip platform.

| Sample ID | Category | Conc. (copies/reaction) | Ct <sub>LW</sub> (min) | Cy <sub>LW</sub> (min) | TTP <sub>LC96</sub> (min) | TTP ± STD (min) | PCR-Pf Mean ± STD (cycles) |
|-----------|----------|-------------------------|------------------------|------------------------|---------------------------|-----------------|----------------------------|
| 1         | H        | 5.46E+04                | 11.33                  | 10.91                  | 13.02                     | 8.25 ± 0.10     | 19.38 ± 0.04               |
| 2         | H        | 1.94E+04                | 16.12                  | 15.43                  | 12.68                     | 8.25 ± 0.07     | 20.93 ± 0.10               |
| 3         | M-L      | 5.33E+02                | 13.58                  | 12.68                  | 13.10                     | 10.08 ± 0.45    | 26.34 ± 0.16               |
| 4         | H        | 6.81E+03                | 17.02                  | 15.23                  | 11.29                     | 7.9 ± 0.10      | 22.51 ± 0.09               |
| 5         | H        | 7.20E+03                | 16.17                  | 14.49                  | 16.15                     | 8.36 ± 0.12     | 22.42 ± 0.07               |
| 6         | L        | 5.45E+01                | 18.58                  | 17.46                  | 15.73                     | 10.37 ± 0.07    | 29.77 ± 0.12               |
| 7         | M-L      | 1.57E+03                | 22.22                  | 21.43                  | 14.43                     | 12.425 ± 0.08   | 24.72 ± 0.13               |
| 8         | M-L      | 1.50E+03                | 16.32                  | 15.44                  | 14.24                     | 12.26 ± 0.18    | 24.78 ± 0.08               |
| 9         | M-L      | 1.16E+02                | 16.52                  | 14.31                  | 17.95                     | 11.43 ± 0.14    | 28.63 ± 0.06               |
| 10        | H        | 2.56E+04                | 14.17                  | 12.51                  | 13.46                     | 7.39 ± 0.16     | 20.52 ± 0.13               |
| 11        | M-L      | 1.08E+03                | 18.08                  | 16.03                  | 16.19                     | 9.03 ± 0.03     | 25.27 ± 0.06               |
| 12        | M-L      | 9.45E+02                | 17.95                  | 16.86                  | 12.94                     | 13.89 ± 1.54    | 25.48 ± 0.01               |
| 13        | H        | 4.32E+04                | 9.17                   | 8.16                   | 9.67                      | 7.88 ± 0.16     | 19.73 ± 0.08               |
| 14        | H        | 9.63E+04                | 12.65                  | 12.06                  | 13.64                     | 7.72 ± 0.07     | 18.52 ± 0.13               |

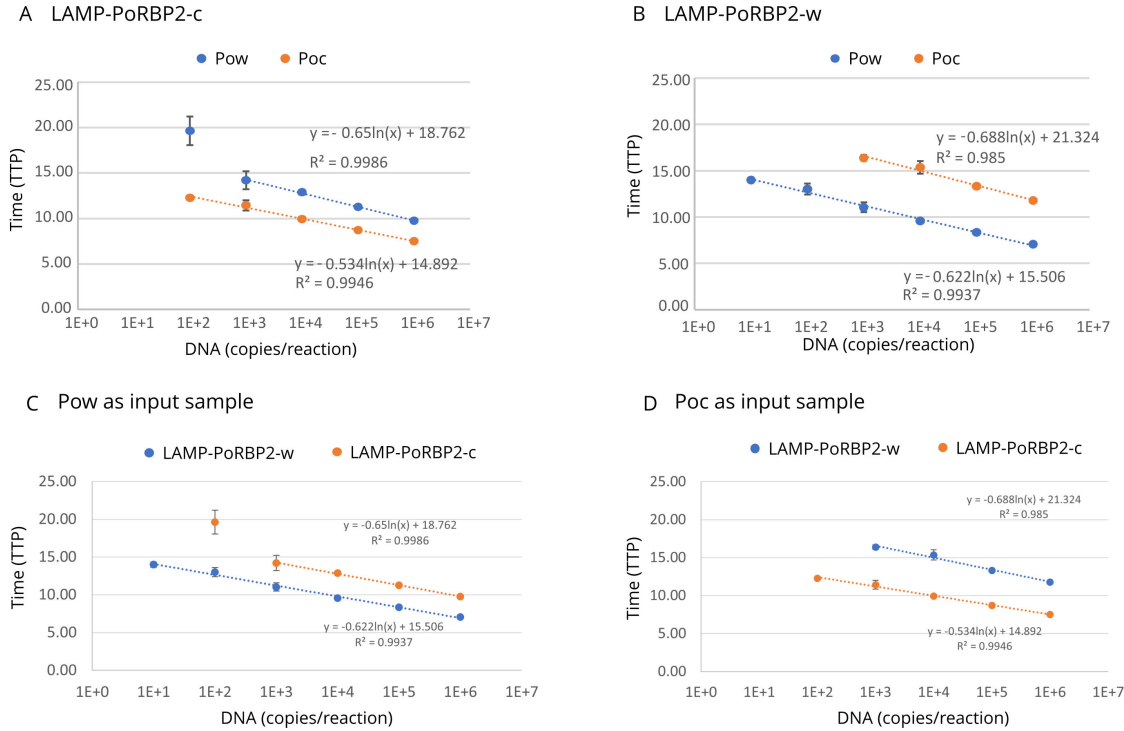

Figure S1. Standard curves of LAMP-PoRBP2-c and LAMP-PoRBP2-w assays. (A) Standard curves of the LAMP-PoRBP2-c assay evaluated with a serial dilution of *P.o. curtisi* and *P.o. wallikeri* synthetic DNA. (B) Standard curves of the LAMP-PoRBP2-w assay evaluated with a serial dilution of *P.o. curtisi* and *P.o. wallikeri* synthetic DNA. (C) Standard curves of a serial dilution of *P. ovale wallikeri* using LAMP-PoRBP2-w and LAMP-PoRBP2-c assays. (D) Standard curves of a serial dilution of *P. ovale curtisi* using LAMP-PoRBP2-w and LAMP-PoRBP2-c assays. The specificity of the assays is shown by the earlier TTPs obtained in the specific reactions compared to the non-specific reactions. The assays should be run independently but in parallel and the earliest outcome may indicate the diagnosed species.

## A LAMP-PcyTUBA2

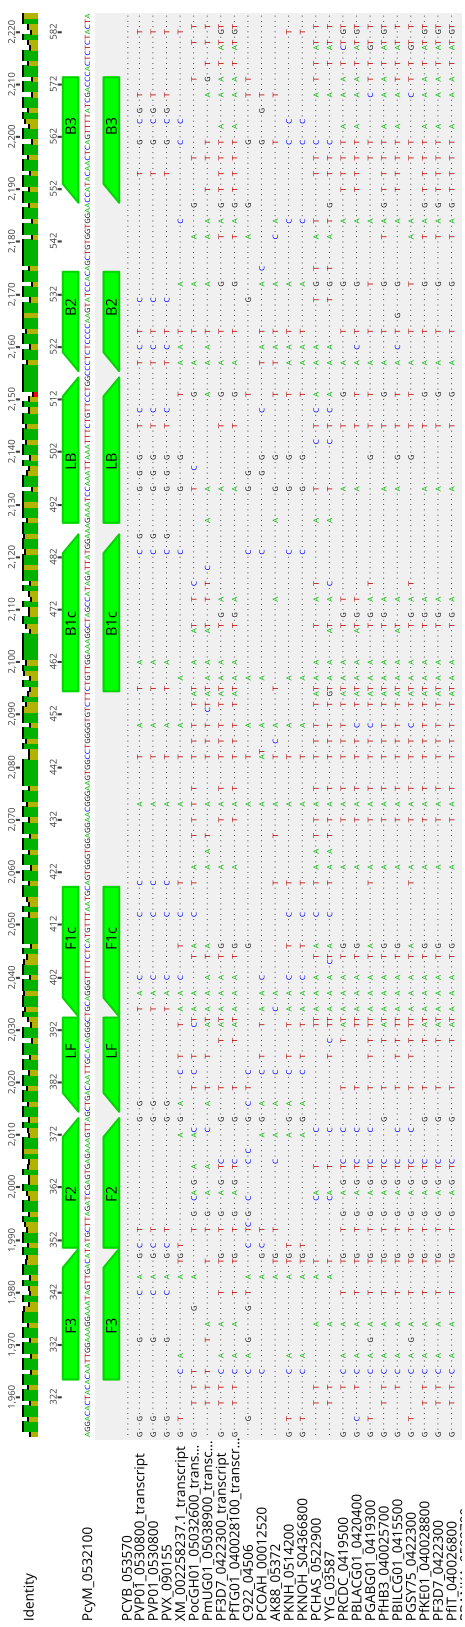

## B LAMP-PK13

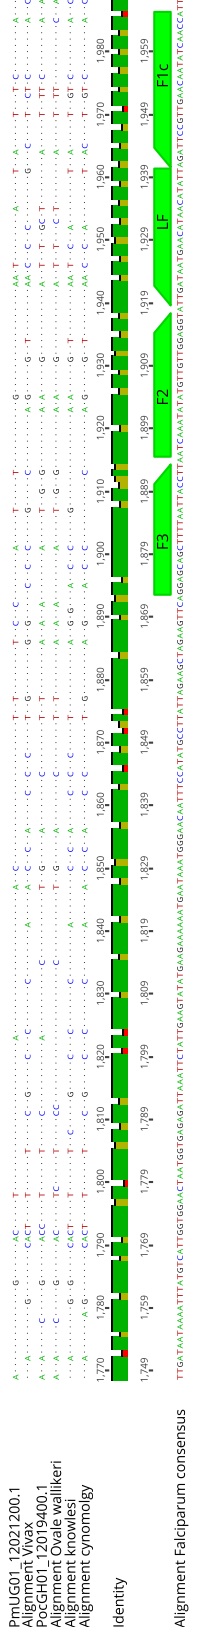

## C LAMP-PyTUBA2

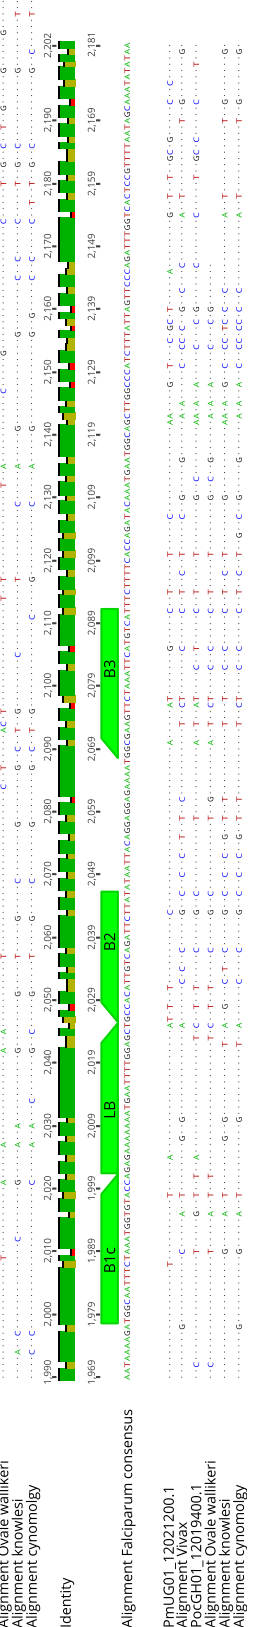

## D LAMP-PoRBP2-c

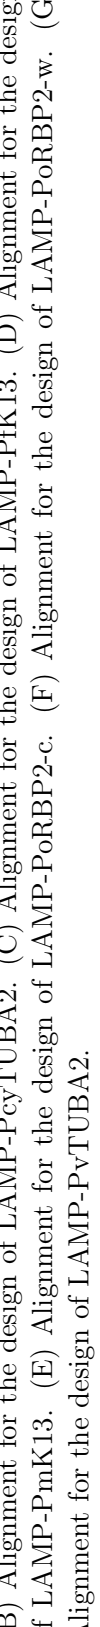

Figure S2. Sequence alignment of all human-infective *Plasmodium* species. (A) Alignment for the design of LAMP-PcyTUBA2. (B) Alignment for the design of LAMP-PK13. (C) Alignment for the design of LAMP-PyTUBA2. (D) Alignment for the design of LAMP-PmK13. (E) Alignment for the design of LAMP-PoRBP2-c. (F) Alignment for the design of LAMP-PvTUBA2.

### C LAMP-PfmK13

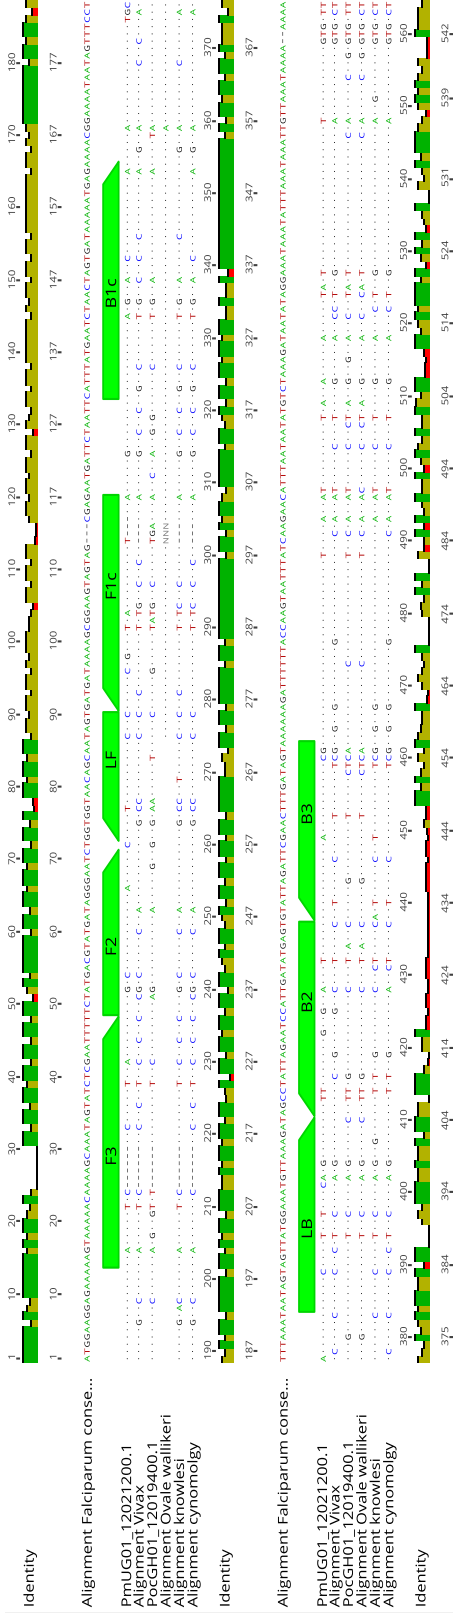

### D LAMP-PoRBP2-c

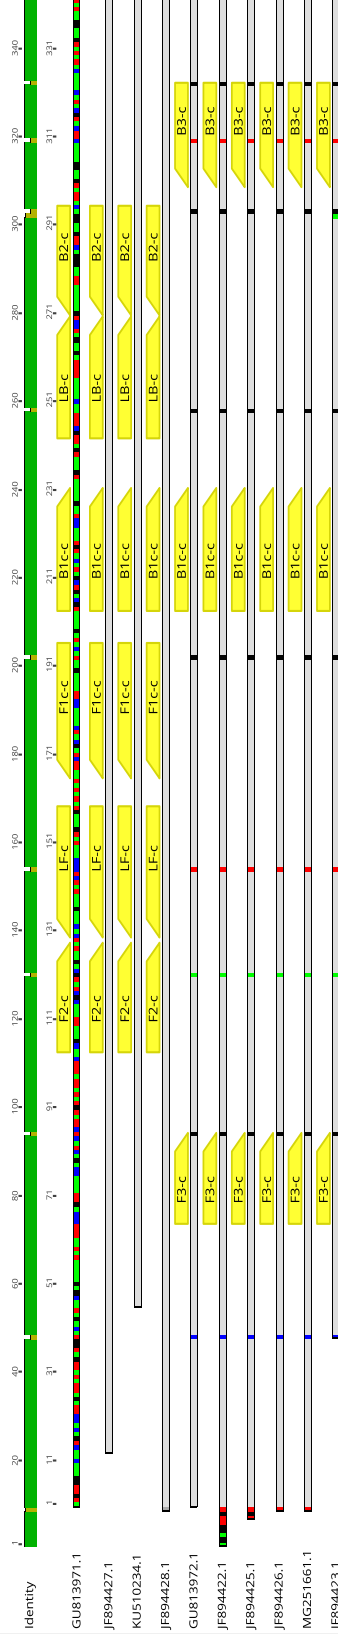

Figure S2. Sequence alignment of all human-infective *Plasmodium* species. (A) Alignment for the design of LAMP-PcyTUBA2. (B) Alignment for the design of LAMP-PcyTUBA2. (C) Alignment for the design of LAMP-PfK13. (D) Alignment for the design of LAMP-PmK13. (E) Alignment for the design of LAMP-PoRBP2-c. (F) Alignment for the design of LAMP-PoRBP2-w. (G) Alignment for the design of LAMP-PvTUBA2.

### E LAMP-PoRBP2-w

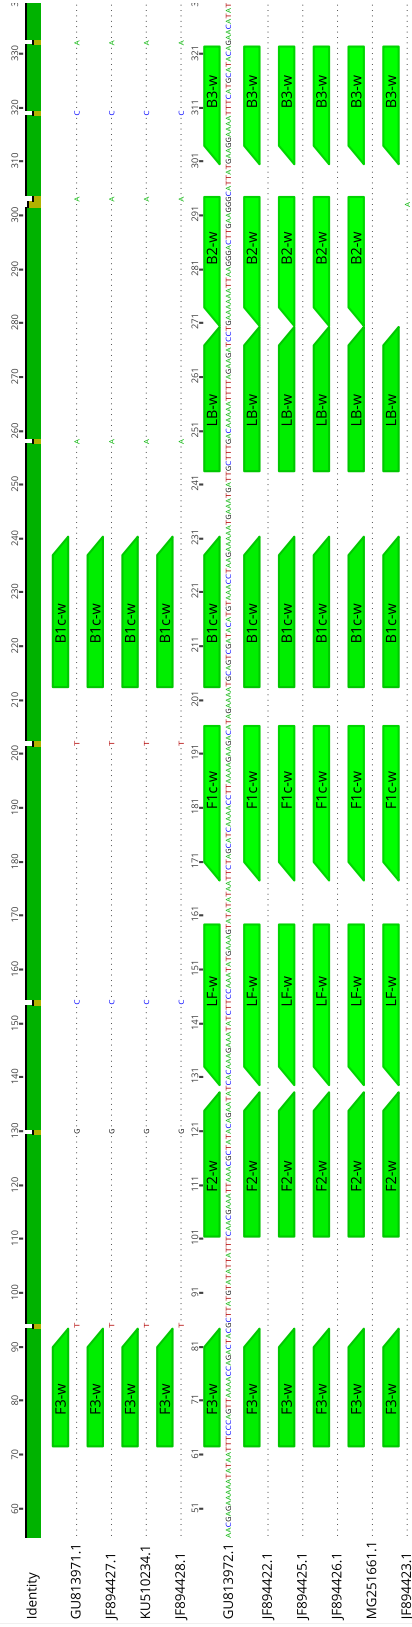

### F LAMP-PvTUBA2

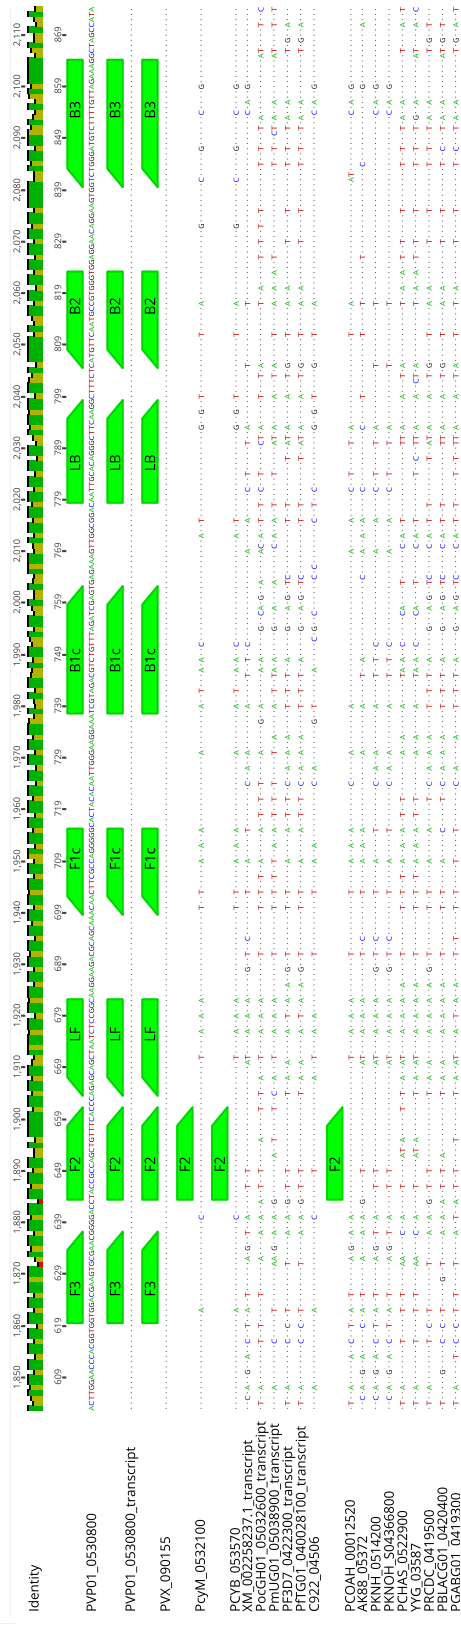

Figure S2. Sequence alignment of all human-infective *Plasmodium* species. (A) Alignment for the design of LAMP-PcyTUBA2. (B) Alignment for the design of LAMP-PfK13. (C) Alignment for the design of LAMP-PmK13. (D) Alignment for the design of LAMP-PoRBP2-c. (E) Alignment for the design of LAMP-PoRBP2-w. (F) Alignment for the design of LAMP-PvTUBA2.

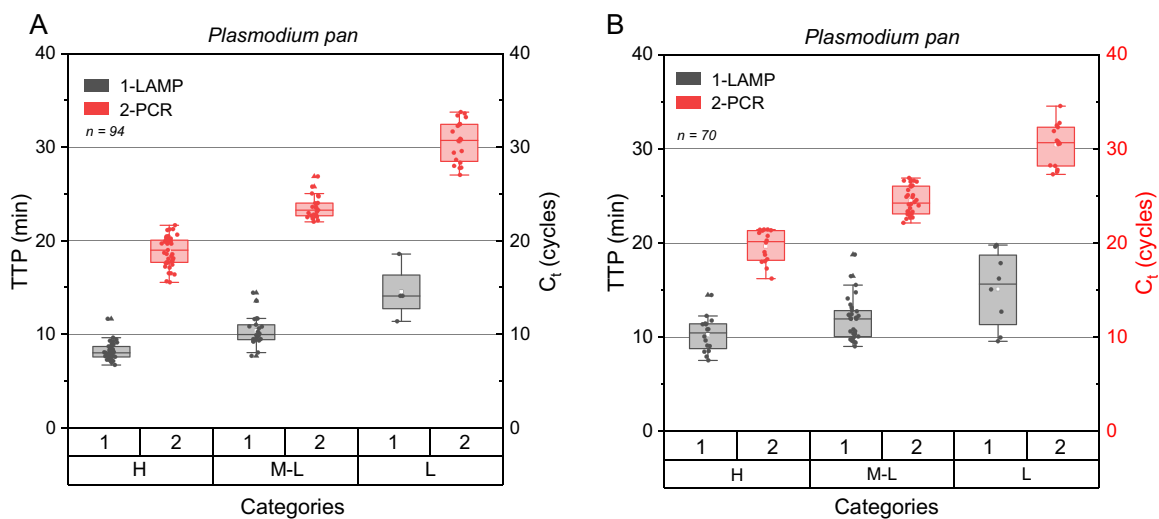

Figure S3. clinical sensitivity and specificity of the assay LAMP-Pan18S with cohort 1 and cohort 2. (A) Boxplot and whisker plots showing the distribution of *Plasmodium-pan* positive samples by PCR-Pan in cohort 1 and LAMP-Pan18S across parasitic loads (H= high, M-L= medium-low, L=low), N = 70. (B) Boxplot and whisker plots showing the distribution of *Plasmodium-pan* positive samples by PCR-Pan and LAMP-Pan18S in cohort 2 across parasitic loads (H= high, M-L= medium-low, L=low), N = 94.

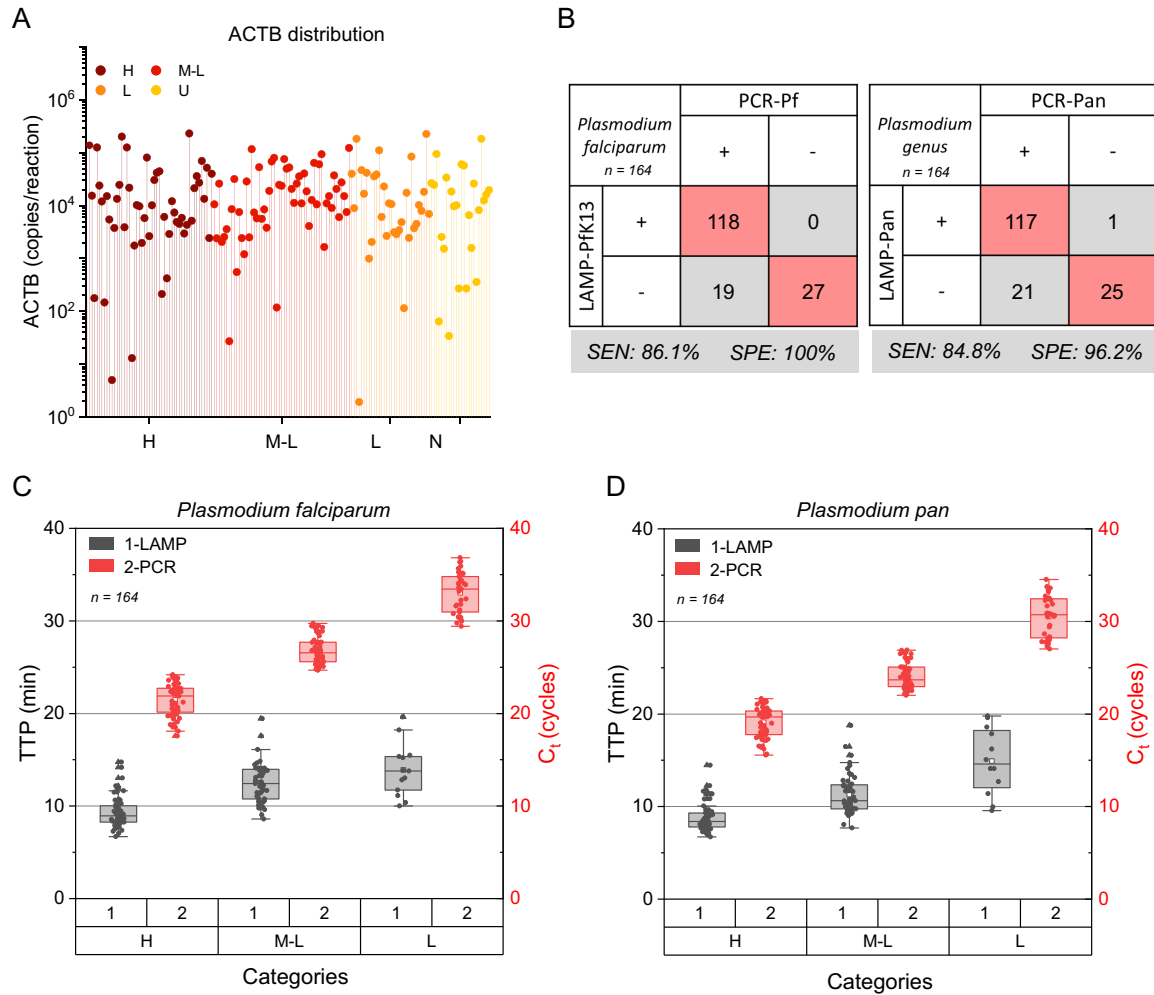

Figure S4. Overall clinical sensitivity and specificity of cohort 1 and 2. (A) Distribution of ACTB concentration across all the samples according to their parasitic load (H= high, M-L= medium-low, L=low, N=negative), N = 164. (B) Clinical sensitivity and specificity matrices of LAMP-PfK13 assay and LAMP-Pan18S versus the gold standard TaqMan qPCR assays PCR-Pf and PCR-Pan, respectively (N = 164). (C) Boxplot and whisker plots showing the distribution of *Plasmodium falciparum* positive samples by PCR-Pf and LAMP-PfK13 across parasitic loads (H= high, M-L= medium-low, L=low, N=negative), N = 164. (D) Boxplot and whisker plots showing the distribution of *Plasmodium-pan* positive samples by PCR-Pan and LAMP-Pan18S across parasitic loads (H= high, M-L= medium-low, L=low, N=negative), N = 164.
